# Supplementary material
Source: PubMed Central journal article supplement (PMC3697662)
Supplement: JCM.03314-12_zjm999092586so2.pdf [file JCM.03314-12_zjm999092586so2.pdf]

## Supplemental table 1

Study data sheet. Showing the raw data collected during the study. Status= status of the volunteers either patients with Lower urinary Tract Symptoms (LUTS) or control volunteer, Pyuria= white blood cell count on urine microscopy ( $\text{Wbc ml}^{-1}$ ), Routine culture result= the organism, if any described on routine laboratory urine culture taking a threshold of  $>10^5$  cfu  $\text{ml}^{-1}$ , Sediment sample= the method of collection of the urine specimen either mid-stream urine (MSU) or catheter specimen (CSU), Total sediment organism count= The total number of organisms counted in the sediment culture. The subsequent columns describe the different organisms in each culture (org) with a different column for each organism identified.
